# Supplementary material for: Effects of Traditional and Modern Post-Harvest Withering Processes on the Composition of the Vitis v. Corvina Grape and the Sensory Profile of Amarone Wines
Source: MDPI journal article supplement (doi:10.3390/molecules26175198), 2021-08-27

# Effects of Traditional and Modern Post-Harvest Withering Processes on the Composition of the Vitis v. Corvina Grape and the Sensory Profile of Amarone Wines

Diego Tomasi <sup>1</sup>, Andrea Lonardi <sup>2</sup>, Davide Boscaro <sup>1</sup>, Tiziana Nardi <sup>1</sup>, Christine Mayr Marangon <sup>3</sup>, Mirko De Rosso <sup>1</sup>, Riccardo Flamini <sup>1</sup>, Lorenzo Lovat <sup>1</sup> and Giovanni Mian <sup>1,4\*</sup>

<sup>1</sup> Council for Agricultural Research and Economics – Research Centre for Viticulture and Oenology CREA-VE Viale XXVIII aprile 26, 31015 Conegliano, TV, Italy.  
diego.tomasi@crea.gov.it (D.T.); davide.boscaro@crea.gov.it (D.B.);  
tiziana.nardi@crea.gov.it (T.N.); mirko.derosso@crea.gov.it (M.D.R.);  
riccardo.flamini@crea.gov.it (R.F.); lorenzo.lovat@crea.gov.it (L.L.)

<sup>2</sup> Bertani Domains Società Agricola A R.L., Via Asiago 1, 37023 Grezzana (VR),  
andrea.lonardi@bertani.net

<sup>3</sup> Department of Agronomy, Food, Natural Resources, Animals and Environment (DAFNAE), University of Padova, Viale dell'Università 16, 35020 Padova, Italy,  
christine.marangon@unipd.it (C.M.M.)

<sup>4</sup> Department of AgriFood, Environmental and Animal Sciences, University of Udine,  
Via delle Scienze 206, 33100 Udine, Italy

\* Correspondence: giovanni.mian@uniud.it

## Supplementary Materials

**Table S1.** Stilbenes identified in Corvina grape before withering. Signal intensities are normalized to the internal standard.

| <i>stilbenes identified</i>      | signal intensity |
|----------------------------------|------------------|
| <i>trans</i> -resveratrol        | 169027           |
| piceatannol                      | 490372           |
| <i>cis</i> -piceid               | 34732            |
| <i>trans</i> -piceid             | 35455            |
| <i>E</i> -astringin              | 19778            |
| <i>Z</i> -astringin              | 5072             |
| pallidol                         | 11191            |
| resveratrol dimer                | 5555             |
| <i>Z</i> - $\epsilon$ -viniferin | 122415           |
| <i>Z</i> - $\omega$ -viniferin   | 19796            |
| <i>E</i> - $\epsilon$ -viniferin | 582239           |
| $\delta$ -viniferin              | 8816             |
| caraphenol                       | 24940            |
| pallidol-glucoside               | 24020            |
| $\alpha$ -viniferin              | 1848             |
| <i>Z</i> -miyabenol C            | 4538             |
| <i>E</i> -miyabenol C            | 26439            |
| resveratrol tetramer 1           | 5076             |
| resveratrol tetramer 2           | 16480            |

**Table S2.** Contents of glycoside precursors of volatile organic compounds (VOCs) identified in Corvina grapes harvested in 2016 and withered in controlled (C) and not-controlled (NC) environments (data expressed as µg 1-heptanol/kg d.g.).

| 2016                                 | (µg 1-heptanol/Kg d.g.) |     |         |      |      |      |         |      |      |      |         |      |      |     |
|--------------------------------------|-------------------------|-----|---------|------|------|------|---------|------|------|------|---------|------|------|-----|
|                                      | T0                      |     | -10% WL |      |      |      | -20% WL |      |      |      | -30% WL |      |      |     |
|                                      | Mean                    | STD | C       |      | NC   |      | C       |      | NC   |      | C       |      | NC   |     |
| Mean                                 |                         |     | STD     | Mean | STD  | Mean | STD     | Mean | STD  | Mean | STD     | Mean | STD  |     |
| <i>aliphatic alcohols</i>            |                         |     |         |      |      |      |         |      |      |      |         |      |      |     |
| 1-butanol                            | 48                      | 18  | 87      | 19   | 64   | 3    | 101     | 8    | 101  | 12   | 92      | 30   | 97   | 4   |
| 3-methyl-1-butanol                   | 47                      | 15  | 105     | 50   | 64   | 27   | 211     | 53   | 87   | 28   | 150     | 60   | 94   | 42  |
| 3-methy-3-buten-1-ol                 | 25                      | 4   | 33      | 3    | 30   | 6    | 36      | 4    | 38   | 3    | 33      | 11   | 36   | 1   |
| 1-pentanol                           | 7                       | 1   | 13      | 3    | 8    | 2    | 16      | 6    | 11   | 1    | 17      | 1    | 14   | 3   |
| 3-methyl-2-buten-1-ol                | 61                      | 10  | 88      | 16   | 76   | 17   | 107     | 15   | 91   | 11   | 93      | 21   | 99   | 11  |
| 1-hexanol                            | 69                      | 18  | 77      | 19   | 56   | 4    | 110     | 18   | 74   | 17   | 113     | 71   | 119  | 55  |
| 3-hexen-1-ol (E)                     | 1                       | 0   | 1       | 0    | 1    | 0    | 3       | 1    | 1    | 1    | 2       | 1    | 2    | 1   |
| 3-hexen-1-ol (Z)                     | 22                      | 6   | 17      | 1    | 14   | 3    | 20      | 2    | 15   | 5    | 17      | 6    | 17   | 4   |
| 2-butoxyethanol                      | 6                       | 2   | 11      | 1    | 11   | 1    | 152     | 128  | 137  | 32   | 40      | 36   | 37   | 23  |
| 2-hexenol                            | 11                      | 2   | 12      | 2    | 11   | 2    | 16      | 9    | 15   | 5    | 18      | 8    | 18   | 2   |
| <i>C<sub>6</sub>-aldehydes</i>       |                         |     |         |      |      |      |         |      |      |      |         |      |      |     |
| hexanal                              | 13                      | 3   | 23      | 2    | 29   | 11   | 27      | 11   | 25   | 11   | 13      | 5    | 20   | 3   |
| 2-hexenal                            | 14                      | 3   | 20      | 3    | 26   | 9    | 14      | 5    | 21   | 7    | 9       | 4    | 15   | 1   |
| <i>monoterpenes</i>                  |                         |     |         |      |      |      |         |      |      |      |         |      |      |     |
| <i>trans</i> -furanlinalool oxide    | 2                       | 0   | 3       | 1    | 2    | 1    | 3       | 1    | 3    | 1    | 3       | 1    | 3    | 2   |
| <i>cis</i> -furanlinalool oxide      | 2                       | 0   | 3       | 0    | 2    | 1    | 3       | 0    | 2    | 1    | 2       | 1    | 2    | 1   |
| linalool                             | 15                      | 7   | 14      | 1    | 13   | 5    | 6       | 0    | 18   | 4    | 8       | 4    | 10   | 3   |
| α-terpineol                          | 3                       | 0   | 5       | 1    | 3    | 1    | 5       | 1    | 4    | 1    | 4       | 1    | 4    | 3   |
| <i>trans</i> -pyranlinalool oxide    | 8                       | 2   | 11      | 2    | 8    | 5    | 12      | 2    | 11   | 4    | 11      | 4    | 11   | 7   |
| nerol                                | 16                      | 1   | 24      | 4    | 18   | 4    | 21      | 6    | 22   | 2    | 19      | 6    | 20   | 1   |
| geraniol                             | 69                      | 7   | 100     | 7    | 88   | 20   | 95      | 11   | 97   | 9    | 87      | 23   | 92   | 6   |
| 2-exo-2-hydroxycineol                | 9                       | 3   | 11      | 2    | 11   | 5    | 13      | 3    | 13   | 4    | 14      | 7    | 13   | 4   |
| diendiol I                           | 10                      | 3   | 10      | 2    | 11   | 5    | 10      | 3    | 12   | 4    | 11      | 6    | 9    | 3   |
| <i>trans</i> -8-hydroxylinalool      | 39                      | 17  | 73      | 17   | 50   | 13   | 68      | 21   | 61   | 4    | 77      | 7    | 59   | 20  |
| hydroxygeraniol                      | 19                      | 2   | 37      | 6    | 26   | 8    | 44      | 3    | 36   | 5    | 37      | 10   | 41   | 5   |
| <i>cis</i> -8-hydroxylinalool        | 104                     | 31  | 132     | 24   | 90   | 48   | 128     | 33   | 143  | 20   | 134     | 32   | 125  | 45  |
| geranic acid                         | 56                      | 6   | 116     | 11   | 91   | 12   | 107     | 11   | 120  | 9    | 106     | 25   | 116  | 9   |
| 7-hydroxy-α-terpineol                | 203                     | 105 | 268     | 81   | 280  | 167  | 345     | 121  | 335  | 166  | 344     | 230  | 308  | 74  |
| <i>C<sub>13</sub>-norisoprenoids</i> |                         |     |         |      |      |      |         |      |      |      |         |      |      |     |
| 3-hydroxy-β-damascenone              | 35                      | 6   | 41      | 8    | 35   | 9    | 50      | 9    | 40   | 7    | 43      | 12   | 46   | 14  |
| 3-oxo-α-ionol                        | 331                     | 35  | 485     | 55   | 385  | 92   | 502     | 41   | 511  | 10   | 467     | 43   | 488  | 91  |
| 3,9-dihydroxy-megastigma-5-ene       | 28                      | 5   | 35      | 4    | 26   | 6    | 38      | 3    | 35   | 1    | 37      | 6    | 36   | 8   |
| 3-hydroxy-7,8-dihydro-α-ionol        | 23                      | 3   | 33      | 6    | 29   | 7    | 36      | 2    | 35   | 3    | 36      | 9    | 35   | 2   |
| vomifoliol                           | 368                     | 81  | 510     | 115  | 439  | 92   | 524     | 85   | 556  | 39   | 543     | 90   | 538  | 107 |
| <i>benzenoids</i>                    |                         |     |         |      |      |      |         |      |      |      |         |      |      |     |
| benzaldehyde                         | 46                      | 53  | 36      | 27   | 18   | 2    | 26      | 11   | 20   | 9    | 22      | 9    | 17   | 5   |
| acetophenone                         | 6                       | 6   | 6       | 2    | 5    | 2    | 6       | 2    | 7    | 1    | 6       | 2    | 8    | 3   |
| methyl salicylate                    | 15                      | 15  | 15      | 8    | 9    | 3    | 13      | 6    | 10   | 2    | 9       | 1    | 12   | 7   |
| guaiacol                             | 5                       | 2   | 26      | 11   | 9    | 4    | 22      | 4    | 10   | 4    | 19      | 8    | 15   | 7   |
| benzyl alcohol                       | 590                     | 173 | 799     | 207  | 1100 | 269  | 924     | 151  | 1345 | 590  | 964     | 213  | 1337 | 541 |
| β-phenylethanol                      | 276                     | 26  | 391     | 96   | 404  | 85   | 478     | 64   | 447  | 63   | 418     | 135  | 436  | 39  |
| eugenol                              | 20                      | 3   | 29      | 5    | 29   | 3    | 34      | 4    | 37   | 3    | 28      | 6    | 33   | 5   |
| 4-vinylguaiacol                      | 375                     | 76  | 808     | 186  | 800  | 107  | 993     | 68   | 900  | 42   | 841     | 201  | 999  | 161 |
| syringol                             | 58                      | 12  | 275     | 86   | 83   | 41   | 228     | 70   | 87   | 33   | 176     | 75   | 127  | 56  |
| 4-vinylphenol                        | 105                     | 47  | 404     | 207  | 380  | 99   | 402     | 29   | 379  | 85   | 219     | 23   | 409  | 110 |
| vanillin                             | 30                      | 6   | 54      | 15   | 48   | 5    | 66      | 8    | 51   | 6    | 56      | 16   | 55   | 2   |
| methyl vanillate                     | 42                      | 15  | 54      | 13   | 51   | 21   | 67      | 16   | 59   | 13   | 59      | 23   | 53   | 8   |
| acetovanillone                       | 297                     | 45  | 443     | 115  | 482  | 67   | 512     | 88   | 580  | 114  | 478     | 123  | 619  | 154 |
| vanillic alcohol                     | 267                     | 48  | 620     | 335  | 625  | 42   | 760     | 213  | 724  | 155  | 601     | 111  | 815  | 243 |
| homovanillic alcohol                 | 196                     | 46  | 416     | 134  | 394  | 51   | 437     | 85   | 509  | 59   | 467     | 131  | 539  | 11  |
| 4-hydroxy benzene ethanol            | 70                      | 24  | 260     | 107  | 291  | 20   | 317     | 98   | 307  | 43   | 248     | 83   | 330  | 64  |
| <i>furanic compounds</i>             |                         |     |         |      |      |      |         |      |      |      |         |      |      |     |
| 5-methylfurfural                     | 27                      | 8   | 43      | 7    | 42   | 3    | 48      | 6    | 57   | 1    | 43      | 15   | 54   | 1   |
| 2-furanmethanol                      | 26                      | 3   | 59      | 11   | 50   | 3    | 66      | 16   | 66   | 2    | 55      | 10   | 70   | 3   |
| furaneol                             | 53                      | 9   | 102     | 18   | 92   | 5    | 114     | 22   | 123  | 1    | 99      | 22   | 124  | 4   |

**Table S3.** Contents of glycoside precursors of volatile organic compounds (VOCs) identified in Corvina grapes harvested in 2017 and withered in controlled (C) and not-controlled (NC) environments (data expressed as µg 1-heptanol/kg d.g.).

| 2017                                 | (µg 1-heptanol/Kg d.g.) |     |         |     |      |     |         |     |      |     |         |     |      |     |
|--------------------------------------|-------------------------|-----|---------|-----|------|-----|---------|-----|------|-----|---------|-----|------|-----|
|                                      | T0                      |     | -10% WL |     |      |     | -20% WL |     |      |     | -30% WL |     |      |     |
|                                      | Mean                    | STD | C       |     | NC   |     | C       |     | NC   |     | C       |     | NC   |     |
|                                      |                         |     | Mean    | STD | Mean | STD | Mean    | STD | Mean | STD | Mean    | STD | Mean | STD |
| <i>aliphatic alcohols</i>            |                         |     |         |     |      |     |         |     |      |     |         |     |      |     |
| 1-butanol                            | 74                      | 24  | 76      | 17  | 68   | 9   | 76      | 9   | 94   | 49  | 112     | 41  | 174  | 58  |
| 3-methyl-1-butanol                   | 79                      | 19  | 117     | 111 | 76   | 16  | 99      | 30  | 118  | 54  | 161     | 109 | 225  | 39  |
| 3-methy-3-buten-1-ol                 | 40                      | 4   | 33      | 2   | 36   | 2   | 35      | 2   | 43   | 8   | 45      | 3   | 45   | 9   |
| 1-pentanol                           | 11                      | 5   | 5       | 0   | 7    | 2   | 8       | 1   | 10   | 4   | 8       | 1   | 16   | 7   |
| 3-methyl-2-buten-1-ol                | 108                     | 14  | 101     | 11  | 104  | 12  | 108     | 19  | 136  | 30  | 112     | 17  | 87   | 77  |
| 1-hexanol                            | 72                      | 8   | 62      | 16  | 62   | 22  | 59      | 14  | 89   | 25  | 86      | 33  | 153  | 27  |
| 3-hexen-1-ol (E)                     | 1                       | 0   | 1       | 0   | 1    | 0   | 1       | 0   | 2    | 1   | 2       | 1   | 3    | 1   |
| 3-hexen-1-ol (Z)                     | 33                      | 4   | 16      | 3   | 23   | 10  | 13      | 5   | 21   | 4   | 14      | 9   | 23   | 2   |
| 2-butoxyethanol                      | 62                      | 45  | 123     | 69  | 78   | 96  | 51      | 32  | 30   | 15  | 95      | 79  | 76   | 71  |
| 2-hexenol                            | 7                       | 2   | 5       | 2   | 4    | 1   | 7       | 2   | 9    | 3   | 6       | 4   | 16   | 9   |
| <i>C<sub>6</sub>-aldehydes</i>       |                         |     |         |     |      |     |         |     |      |     |         |     |      |     |
| hexanal                              | 31                      | 15  | 38      | 13  | 48   | 7   | 110     | 45  | 124  | 59  | 49      | 13  | 89   | 29  |
| 2-hexenal                            | 28                      | 7   | 18      | 6   | 22   | 2   | 11      | 4   | 14   | 1   | 16      | 4   | 16   | 2   |
| <i>monoterpenes</i>                  |                         |     |         |     |      |     |         |     |      |     |         |     |      |     |
| trans- furanlinalool oxide           | 4                       | 1   | 3       | 2   | 5    | 1   | 5       | 4   | 8    | 4   | 3       | 2   | 8    | 2   |
| cis- furanlinalool oxide             | 3                       | 0   | 3       | 1   | 5    | 2   | 6       | 4   | 8    | 4   | 3       | 2   | 8    | 3   |
| linalool                             | 49                      | 12  | 34      | 11  | 40   | 4   | 36      | 19  | 39   | 6   | 19      | 7   | 39   | 37  |
| α-terpineol                          | 5                       | 0   | 5       | 2   | 7    | 3   | 7       | 5   | 12   | 4   | 5       | 3   | 11   | 2   |
| trans -pyranlinalool oxide           | 12                      | 2   | 12      | 5   | 14   | 3   | 14      | 6   | 22   | 10  | 9       | 6   | 22   | 4   |
| nerol                                | 19                      | 3   | 15      | 7   | 17   | 4   | 14      | 6   | 20   | 5   | 16      | 5   | 21   | 3   |
| geraniol                             | 79                      | 14  | 66      | 28  | 76   | 19  | 61      | 26  | 82   | 19  | 80      | 23  | 87   | 21  |
| 2-exo-2-hydroxycineol                | 12                      | 3   | 11      | 5   | 14   | 2   | 14      | 5   | 16   | 2   | 14      | 6   | 24   | 7   |
| diendiol I                           | 12                      | 3   | 10      | 6   | 13   | 4   | 12      | 5   | 15   | 6   | 10      | 8   | 9    | 5   |
| trans -8-hydroxylinalool             | 52                      | 9   | 42      | 12  | 73   | 18  | 43      | 11  | 106  | 78  | 45      | 30  | 86   | 68  |
| hydroxygeraniol                      | 25                      | 6   | 21      | 6   | 35   | 11  | 32      | 14  | 49   | 20  | 31      | 13  | 51   | 6   |
| cis -8-hydroxylinalool               | 228                     | 60  | 162     | 27  | 220  | 38  | 137     | 24  | 209  | 44  | 123     | 33  | 173  | 14  |
| geranic acid                         | 49                      | 10  | 54      | 16  | 84   | 13  | 44      | 13  | 74   | 27  | 108     | 20  | 109  | 22  |
| 7-hydroxy-α-terpineol                | 188                     | 46  | 185     | 120 | 225  | 30  | 214     | 92  | 251  | 45  | 232     | 117 | 249  | 31  |
| <i>C<sub>13</sub>-norisoprenoids</i> |                         |     |         |     |      |     |         |     |      |     |         |     |      |     |
| 3-hydroxy-β-damascenone              | 51                      | 7   | 55      | 8   | 64   | 5   | 66      | 13  | 84   | 22  | 47      | 10  | 109  | 46  |
| 3-oxo-α-ionol                        | 541                     | 63  | 466     | 178 | 737  | 49  | 733     | 150 | 878  | 214 | 562     | 100 | 1340 | 575 |
| 3,9-dihydroxy-megastigma-5-ene       | 31                      | 3   | 35      | 5   | 36   | 4   | 31      | 5   | 41   | 17  | 25      | 9   | 40   | 6   |
| 3-hydroxy-7,8-dihydro-α-ionol        | 28                      | 3   | 28      | 4   | 33   | 1   | 31      | 4   | 37   | 5   | 33      | 5   | 48   | 10  |
| vomifoliol                           | 422                     | 101 | 377     | 52  | 592  | 79  | 623     | 202 | 928  | 308 | 497     | 99  | 1167 | 448 |
| <i>benzenoids</i>                    |                         |     |         |     |      |     |         |     |      |     |         |     |      |     |
| benzaldehyde                         | 39                      | 17  | 30      | 7   | 20   | 2   | 50      | 19  | 32   | 15  | 34      | 16  | 43   | 25  |
| acetophenone                         | 6                       | 1   | 5       | 2   | 5    | 4   | 8       | 3   | 7    | 6   | 6       | 3   | 15   | 14  |
| methyl salicylate                    | 4                       | 2   | 6       | 1   | 3    | 1   | 8       | 3   | 6    | 1   | 6       | 0   | 24   | 18  |
| guaiacol                             | 125                     | 24  | 111     | 104 | 139  | 32  | 243     | 259 | 576  | 324 | 222     | 192 | 799  | 266 |
| benzyl alcohol                       | 572                     | 41  | 748     | 117 | 662  | 170 | 1263    | 259 | 1031 | 242 | 1484    | 360 | 1936 | 942 |
| β-phenylethanol                      | 370                     | 41  | 412     | 99  | 456  | 49  | 368     | 54  | 453  | 113 | 457     | 90  | 593  | 60  |
| eugenol                              | 24                      | 2   | 28      | 2   | 28   | 6   | 23      | 5   | 30   | 10  | 28      | 8   | 55   | 22  |
| 4-vinylguaiacol                      | 578                     | 99  | 493     | 120 | 583  | 85  | 467     | 94  | 746  | 196 | 736     | 159 | 1092 | 139 |
| syringol                             | 160                     | 31  | 145     | 72  | 241  | 128 | 344     | 296 | 741  | 286 | 253     | 235 | 825  | 291 |
| 4-vinylphenol                        | 265                     | 126 | 135     | 103 | 228  | 54  | 281     | 129 | 579  | 219 | 688     | 312 | 513  | 192 |
| vanillin                             | 48                      | 5   | 68      | 18  | 78   | 16  | 99      | 25  | 137  | 17  | 93      | 21  | 154  | 47  |
| methyl vanillate                     | 16                      | 5   | 18      | 7   | 25   | 2   | 20      | 10  | 33   | 9   | 21      | 7   | 43   | 14  |
| acetovanillone                       | 268                     | 24  | 240     | 192 | 377  | 68  | 321     | 14  | 467  | 132 | 340     | 61  | 744  | 262 |
| vanillic alcohol                     | 239                     | 73  | 324     | 71  | 422  | 35  | 517     | 139 | 754  | 154 | 641     | 198 | 1079 | 430 |
| homovanillic alcohol                 | 349                     | 65  | 381     | 67  | 358  | 114 | 390     | 42  | 518  | 136 | 518     | 61  | 624  | 93  |
| 4-hydroxy benzene ethanol            | 196                     | 51  | 112     | 129 | 70   | 10  | 28      | 3   | 46   | 21  | 411     | 111 | 158  | 175 |
| <i>furanic compounds</i>             |                         |     |         |     |      |     |         |     |      |     |         |     |      |     |
| 5-methylfurfural                     | 9                       | 5   | 7       | 1   | 6    | 1   | 7       | 1   | 7    | 2   | 7       | 1   | 9    | 3   |
| 2-furanmethanol                      | 65                      | 12  | 40      | 5   | 41   | 5   | 36      | 11  | 36   | 15  | 53      | 3   | 41   | 14  |
| furaneol                             | 29                      | 6   | 29      | 5   | 20   | 10  | 25      | 4   | 26   | 4   | 45      | 8   | 32   | 9   |

**Figure S1**

On the left: “arelle” trays present in the non-controlled chamber, on the right trays in the controlled environment

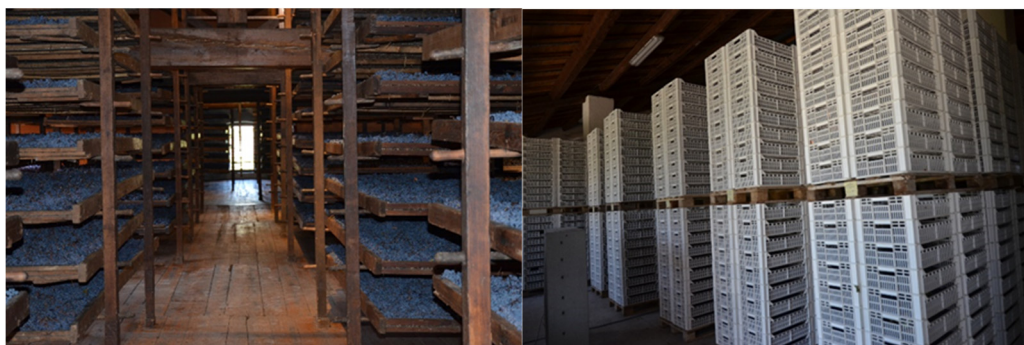

Figure S2

Sheet for wine sensory evaluation and related aroma profile



**SCHEDA DI ANALISI SENSORIALE O.I.V./U.I.C.E. VINI TRANQUILLI • FICHE D'ANALYSE SENSORIELLE O.I.V./U.I.C.E. VINS TRANQUILLES**

N° campione/N° d'ordre de l'échantillon  Commissione/Jury  N° Commissario/N° de Dégustateur   
 Sample n°/N° de orden de la muestra Jury/Jurado Judge n°/ N° de Degustador

|                                                     |                                                                                          | Eccellente<br>Excellent<br>Excelente |      | Molto Buono<br>Très Bon<br>Very Good<br>Muy Bueno |      | Buono<br>Bon<br>Good<br>Bueno |      | Sufficiente<br>Satisfaisant<br>Fair<br>Regular |      | Insufficiente<br>Insuffisant<br>Unsuufficient<br>Insuficiente |      |
|-----------------------------------------------------|------------------------------------------------------------------------------------------|--------------------------------------|------|---------------------------------------------------|------|-------------------------------|------|------------------------------------------------|------|---------------------------------------------------------------|------|
| <b>COLORE<br/>VUE<br/>VISUAL<br/>VISTA</b>          | Limpidezza/Limpidité<br>Limpidity/Limpidez                                               | <input type="checkbox"/>             | (5)  | <input type="checkbox"/>                          | (4)  | <input type="checkbox"/>      | (3)  | <input type="checkbox"/>                       | (2)  | <input type="checkbox"/>                                      | (1)  |
|                                                     | Aspetto/Aspect (nuance)<br>Aspect/Aspecto                                                | <input type="checkbox"/>             | (10) | <input type="checkbox"/>                          | (8)  | <input type="checkbox"/>      | (6)  | <input type="checkbox"/>                       | (4)  | <input type="checkbox"/>                                      | (2)  |
| <b>ODORE<br/>ODORAT<br/>NOSE<br/>OLFATO</b>         | Intensità/Intensité<br>Intensity/Intensidad                                              | <input type="checkbox"/>             | (8)  | <input type="checkbox"/>                          | (7)  | <input type="checkbox"/>      | (6)  | <input type="checkbox"/>                       | (4)  | <input type="checkbox"/>                                      | (2)  |
|                                                     | Franchezza/Franchise<br>Genuiness/Franqueza                                              | <input type="checkbox"/>             | (6)  | <input type="checkbox"/>                          | (5)  | <input type="checkbox"/>      | (4)  | <input type="checkbox"/>                       | (3)  | <input type="checkbox"/>                                      | (2)  |
|                                                     | Qualità/Qualité<br>Quality/Calidad                                                       | <input type="checkbox"/>             | (16) | <input type="checkbox"/>                          | (14) | <input type="checkbox"/>      | (12) | <input type="checkbox"/>                       | (10) | <input type="checkbox"/>                                      | (8)  |
| <b>SAPORE<br/>GOUT<br/>TASTE<br/>GUSTO</b>          | Intensità/Intensité<br>Intensity/Intensidad                                              | <input type="checkbox"/>             | (8)  | <input type="checkbox"/>                          | (7)  | <input type="checkbox"/>      | (6)  | <input type="checkbox"/>                       | (4)  | <input type="checkbox"/>                                      | (2)  |
|                                                     | Franchezza/Franchise<br>Genuiness/Franqueza                                              | <input type="checkbox"/>             | (6)  | <input type="checkbox"/>                          | (5)  | <input type="checkbox"/>      | (4)  | <input type="checkbox"/>                       | (3)  | <input type="checkbox"/>                                      | (2)  |
|                                                     | Qualità/Qualité<br>Quality/Calidad                                                       | <input type="checkbox"/>             | (22) | <input type="checkbox"/>                          | (19) | <input type="checkbox"/>      | (16) | <input type="checkbox"/>                       | (13) | <input type="checkbox"/>                                      | (10) |
|                                                     | Persistenza/Persistence<br>Persistence/Persistencia                                      | <input type="checkbox"/>             | (8)  | <input type="checkbox"/>                          | (7)  | <input type="checkbox"/>      | (6)  | <input type="checkbox"/>                       | (5)  | <input type="checkbox"/>                                      | (4)  |
| <b>ARMONIA<br/>HARMONIE<br/>HARMONY<br/>ARMONIA</b> | <b>GIUDIZIO GLOBALE<br/>JUGEMENT GLOBAL<br/>OVERALL JUDGEMENT<br/>APRECIACION GLOBAL</b> | <input type="checkbox"/>             | (11) | <input type="checkbox"/>                          | (10) | <input type="checkbox"/>      | (9)  | <input type="checkbox"/>                       | (8)  | <input type="checkbox"/>                                      | (7)  |

---

☐ Non degustabile/Non dégustable      Presidente \_\_\_\_\_      Examinatore \_\_\_\_\_      Commissario \_\_\_\_\_

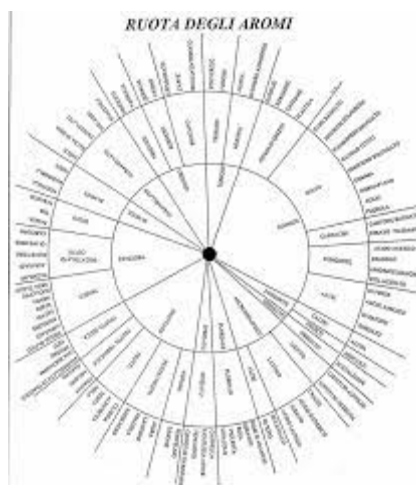

Supplement: s1 [file s1]
